# Supplementary material
Source: PubMed Central journal article supplement (PMC9984438)
Supplement: 41598_2023_28729_MOESM1_ESM.pdf [file 41598_2023_28729_MOESM1_ESM.pdf]

**Supplementary Table 1. Comparison of demographic data, impact, rumination and help seeking behavior between Polish, Ukrainian and Taiwanese respondents**

| Demographic data                                                                          | Mean±SD (Number (%)) |                 |                | P      |
|-------------------------------------------------------------------------------------------|----------------------|-----------------|----------------|--------|
|                                                                                           | Poland (n=1053)      | Ukraine (n=385) | Taiwan (n=188) |        |
| <b>Nationality</b>                                                                        |                      |                 |                |        |
| Polish                                                                                    | 1049 (99.6)          | 2 (0.5)         | 0 (0)          | <0.001 |
| Ukrainian                                                                                 | 0 (0)                | 362 (94)        | 0 (0)          |        |
| Taiwanese                                                                                 | 0 (0)                | 0 (0)           | 185 (98.4)     |        |
| Others                                                                                    | 4 (0.4)              | 21 (5.5)        | 3 (1.6)        |        |
| <b>Current residential country</b>                                                        |                      |                 |                |        |
| Poland                                                                                    | 1033 (98.1)          | 45 (11.7)       | 0 (0)          | <0.001 |
| Ukraine                                                                                   | 1 (0.1)              | 292 (75.8)      | 0 (0)          |        |
| Taiwan                                                                                    | 0 (0)                | 0 (0)           | 186 (98.9)     |        |
| Others                                                                                    | 19 (1.8)             | 48 (12.5)       | 2 (1.1)        |        |
| <b>Were you originated from Ukraine?</b>                                                  |                      |                 |                |        |
| Yes                                                                                       | 31 (2.9)             | 376 (97.7)      | 1 (0.5)        | <0.001 |
| No                                                                                        | 1022 (97.1)          | 9 (2.3)         | 187 (99.5)     |        |
| <b>Was any of your family members originated from Ukraine?</b>                            |                      |                 |                |        |
| Yes                                                                                       | 78 (7.4)             | 379 (98.4)      | 1 (0.5)        | <0.001 |
| No                                                                                        | 975 (92.6)           | 6 (1.6)         | 187 (99.5)     |        |
| <b>Was any of your friends originated from Ukraine?</b>                                   |                      |                 |                |        |
| Yes                                                                                       | 389 (36.9)           | 381 (99)        | 7 (3.7)        | <0.001 |
| No                                                                                        | 664 (63.1)           | 4 (1)           | 181 (96.3)     |        |
| <b>Do any of your friends reside in Ukraine?</b>                                          |                      |                 |                |        |
| Yes                                                                                       | 162 (15.4)           | 382 (99.2)      | 6 (3.2)        | <0.001 |
| No                                                                                        | 891 (84.6)           | 3 (0.8)         | 182 (96.8)     |        |
| <b>There is a person (s) next to me who gives me support</b>                              |                      |                 |                |        |
| No, there is not such a person                                                            | 73 (6.9)             | 41 (10.6)       | 13 (6.9)       | 0.059  |
| Yes, there is such a person                                                               | 980 (93.1)           | 344 (89.4)      | 175 (93.1)     | 0.059  |
| <b>Impact of the 2022 War in Ukraine</b>                                                  |                      |                 |                |        |
| <b>How many times have you had to relocate due to the current Ukraine crisis and war?</b> |                      |                 |                |        |
| Never                                                                                     | 1040 (98.9)          | 180 (46.8)      |                | <0.001 |
| Once                                                                                      | 9 (0.9)              | 112 (29.1)      |                | <0.001 |
| Twice                                                                                     | 2 (0.1)              | 55 (14.3)       | NA             | <0.001 |
| Three times or more                                                                       | 2 (0.1)              | 38 (9.9)        |                | <0.001 |
| <b>The main cause of my stress at this moment is</b>                                      |                      |                 |                |        |
| Educational                                                                               | 28 (2.7)             | 9 (2.3)         | 38 (20.2)      | <0.001 |
| Economical                                                                                | 213 (20.2)           | 41 (10.6)       | 77 (41)        | <0.001 |
| Social                                                                                    | 99 (9.4)             | 32 (8.3)        | 24 (12.8)      | 0.227  |

|                                                                                              |            |            |            |        |
|----------------------------------------------------------------------------------------------|------------|------------|------------|--------|
| War-Related                                                                                  | 515 (48.9) | 269 (69.9) | 25 (13.3)  | <0.001 |
| Medical                                                                                      | 10 (0.9)   | 8 (2.1)    | 11 (5.9)   | <0.001 |
| Others                                                                                       | 188 (17.9) | 26 (6.8)   | 13 (6.9)   | <0.001 |
| <b>Can you deal with your emotions no matter how bad it gets in the war in Ukraine?</b>      |            |            |            |        |
| Yes                                                                                          | 863 (82)   | 315 (81.8) | 167 (88.8) | 0.062  |
| No                                                                                           | 190 (18)   | 70 (18.2)  | 21 (11.2)  |        |
| <b>What is the attitude towards Russian invasion into Ukraine?</b>                           |            |            |            |        |
| Support Russian invasion                                                                     | 5 (0.5)    | 0 (0)      | 1 (0.5)    | 0.390  |
| Against Russian invasion                                                                     | 1021 (97)  | 381 (99)   | 160 (85.1) | <0.001 |
| I do not have an opinion                                                                     | 27 (2.6)   | 4 (1)      | 27 (14.4)  | <0.001 |
| <b>The United Nation, NATO and European Union have done enough to support Ukraine</b>        |            |            |            |        |
| Agree                                                                                        | 180 (17.1) | 31 (8.1)   | 9 (4.8)    | <0.001 |
| Neutral or no comment                                                                        | 408 (38.7) | 138 (35.8) | 75 (39.9)  | 0.531  |
| Disagree                                                                                     | 465 (44.2) | 216 (56.1) | 104 (55.3) | <0.001 |
| <b>Have you participated in protests against the Russian invasion?</b>                       |            |            |            |        |
| Yes                                                                                          | 176 (16.7) | 115 (29.9) | 11 (5.9)   | <0.001 |
| No                                                                                           | 877 (83.3) | 270 (70.1) | 177 (94.1) |        |
| <b>I feel insecure about the current war in Ukraine</b>                                      |            |            |            |        |
| Nearly all the time                                                                          | 158 (15)   | 142 (36.9) | 12 (6.4)   | <0.001 |
| Sometimes                                                                                    | 536 (50.9) | 160 (41.6) | 86 (45.7)  | 0.006  |
| Rarely                                                                                       | 237 (22.5) | 50 (13)    | 57 (30.3)  | <0.001 |
| Not at all                                                                                   | 122 (11.6) | 33 (8.6)   | 33 (17.6)  | 0.007  |
| <b>I feel hopeless about the current war in Ukraine</b>                                      |            |            |            |        |
| Nearly all the time                                                                          | 569 (54)   | 176 (45.7) | 3 (1.6)    | <0.001 |
| Sometimes                                                                                    | 360 (34.2) | 121 (31.4) | 54 (28.7)  | 0.265  |
| Rarely                                                                                       | 67 (6.4)   | 60 (15.6)  | 88 (46.8)  | <0.001 |
| Not at all                                                                                   | 57 (5.4)   | 28 (7.3)   | 43 (22.9)  | <0.001 |
| <b>Help seeking behavior during the war in Ukraine</b>                                       |            |            |            |        |
| <b>If you do NOT want to seek professional help for mental problems, what is the reason?</b> |            |            |            |        |
| I do not have a mental health problem                                                        | 391 (37.1) | 60 (15.6)  | 67 (35.6)  | <0.001 |
| I can handle it myself                                                                       | 230 (21.8) | 149 (38.7) | 55 (29.3)  | <0.001 |
| I prefer to seek help from friends or family members                                         | 90 (8.5)   | 27 (7)     | 34 (18.1)  | <0.001 |
| I do not have money to pay for mental health service                                         | 95 (9)     | 48 (12.5)  | 9 (4.8)    | 0.010  |
| Long waiting time                                                                            | 29 (2.8)   | 1 (0.3)    | 1 (0.5)    | 0.003  |
| No access to mental health service                                                           | 5 (0.5)    | 5 (1.3)    | 0 (0)      | 0.108  |
| Concerns about privacy issue                                                                 | 12 (1.1)   | 6 (1.6)    | 5 (2.7)    | 0.257  |
| Mental health service is ineffective                                                         | 22 (2.1)   | 8 (2.1)    | 3 (1.6)    | 0.904  |
|                                                                                              | 40 (3.8)   | 12 (3.1)   | 7 (3.7)    | 0.827  |

|                                                                    |            |           |         |        |
|--------------------------------------------------------------------|------------|-----------|---------|--------|
| I am too busy and no time for mental health service                | 17 (1.6)   | 1 (0.3)   | 4 (2.1) | 0.089  |
| I do not have a health insurance that covers mental health service | 7 (0.7)    | 46 (11.9) | 0 (0)   | <0.001 |
| Mental health service is disrupted by the war                      | 115 (10.9) | 22 (5.7)  | 3 (1.6) | <0.001 |
| Others                                                             |            |           |         |        |

---
